# Supplementary material
Source: PubMed Central journal article supplement (PMC1744105)
Supplement: qualsafety_14_6_450__1.pdf [file qualsafety_14_6_450__1.pdf]

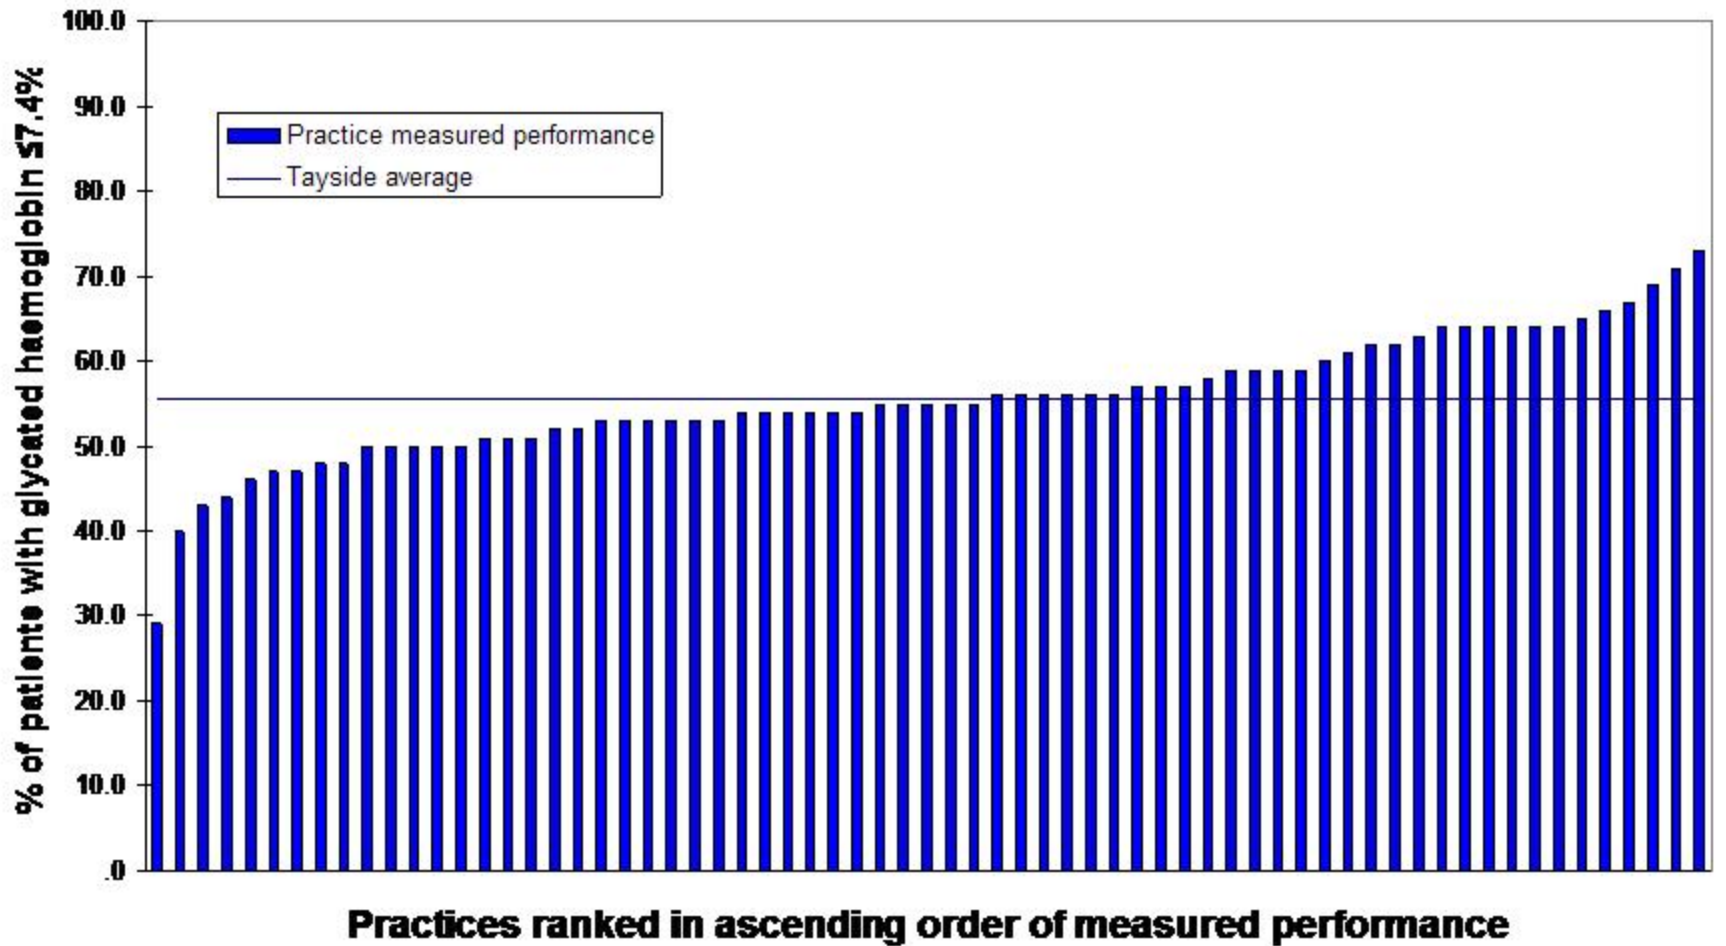

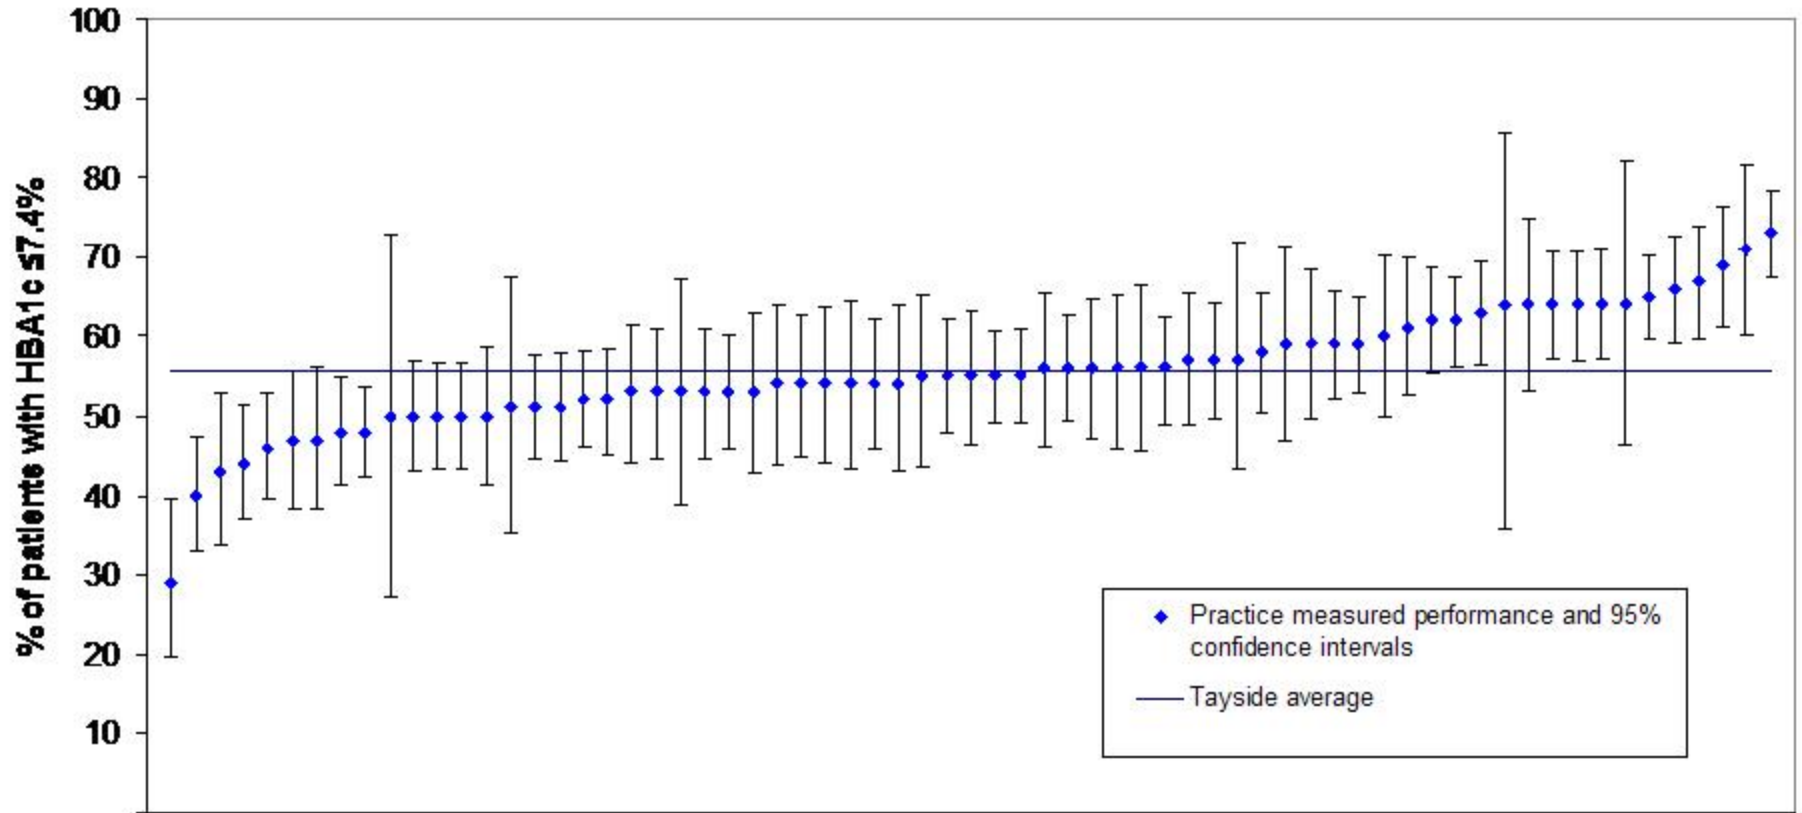

Practices ranked in ascending order of measured performance

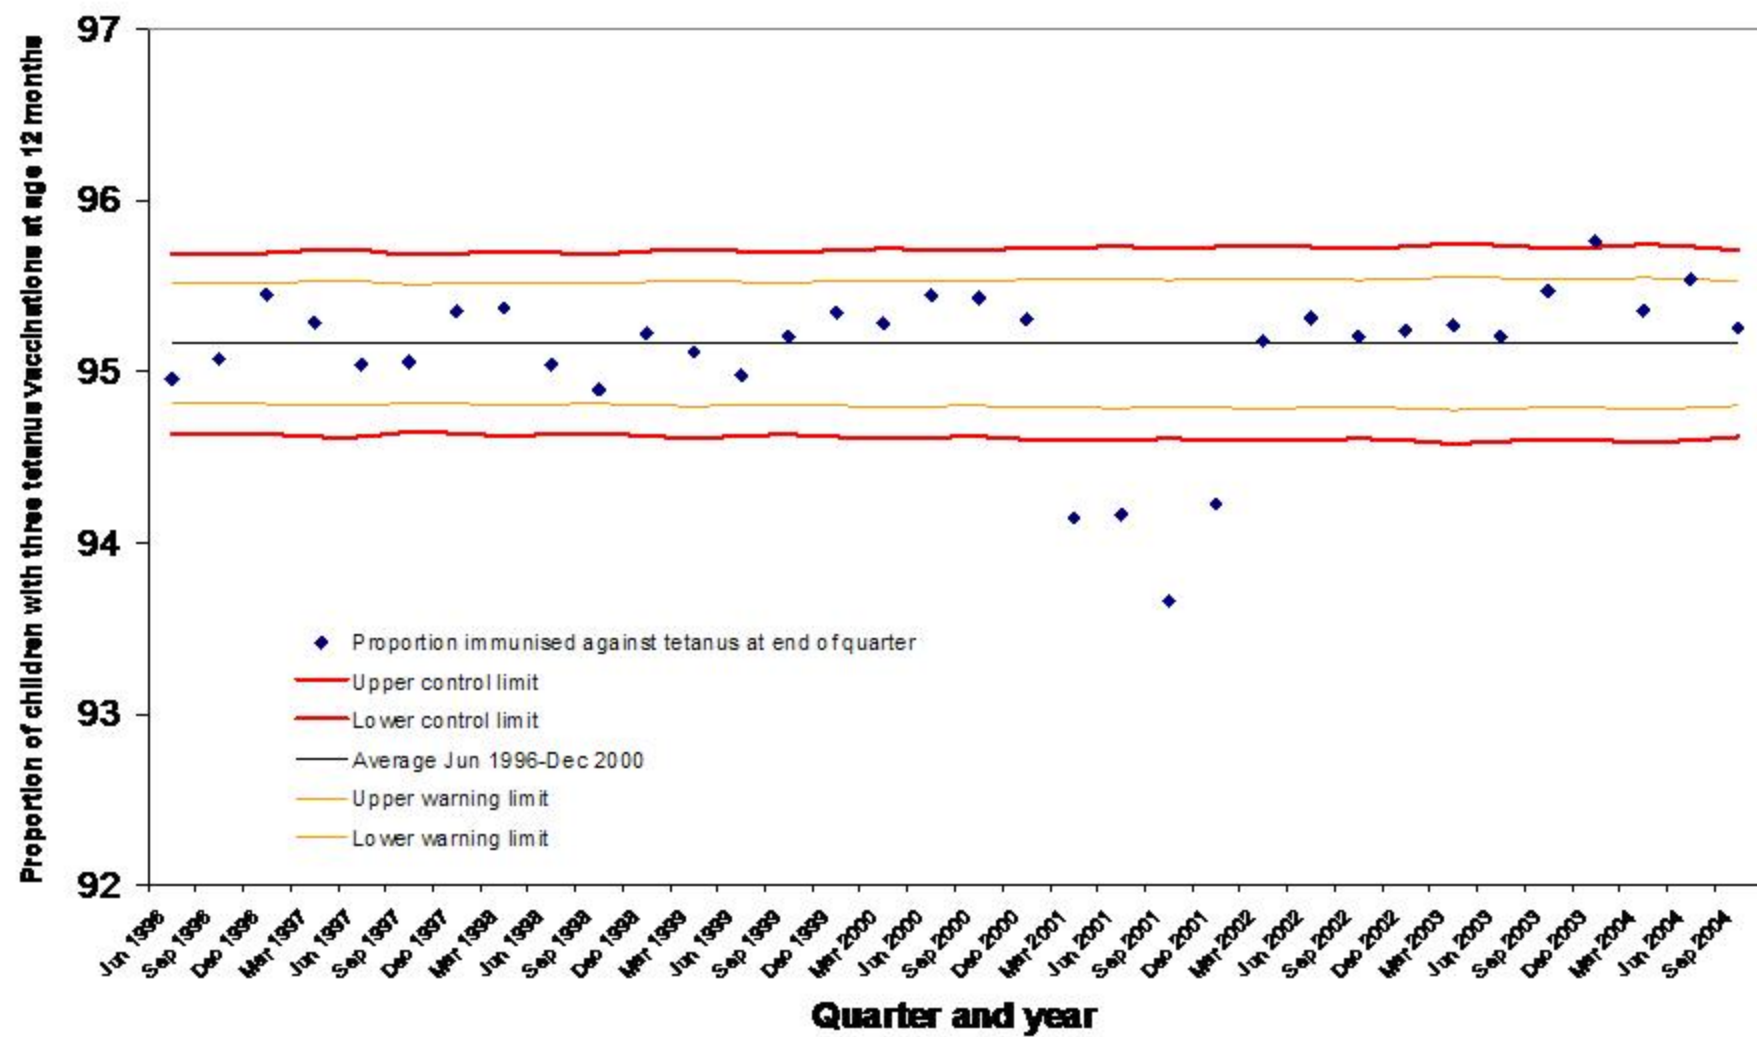

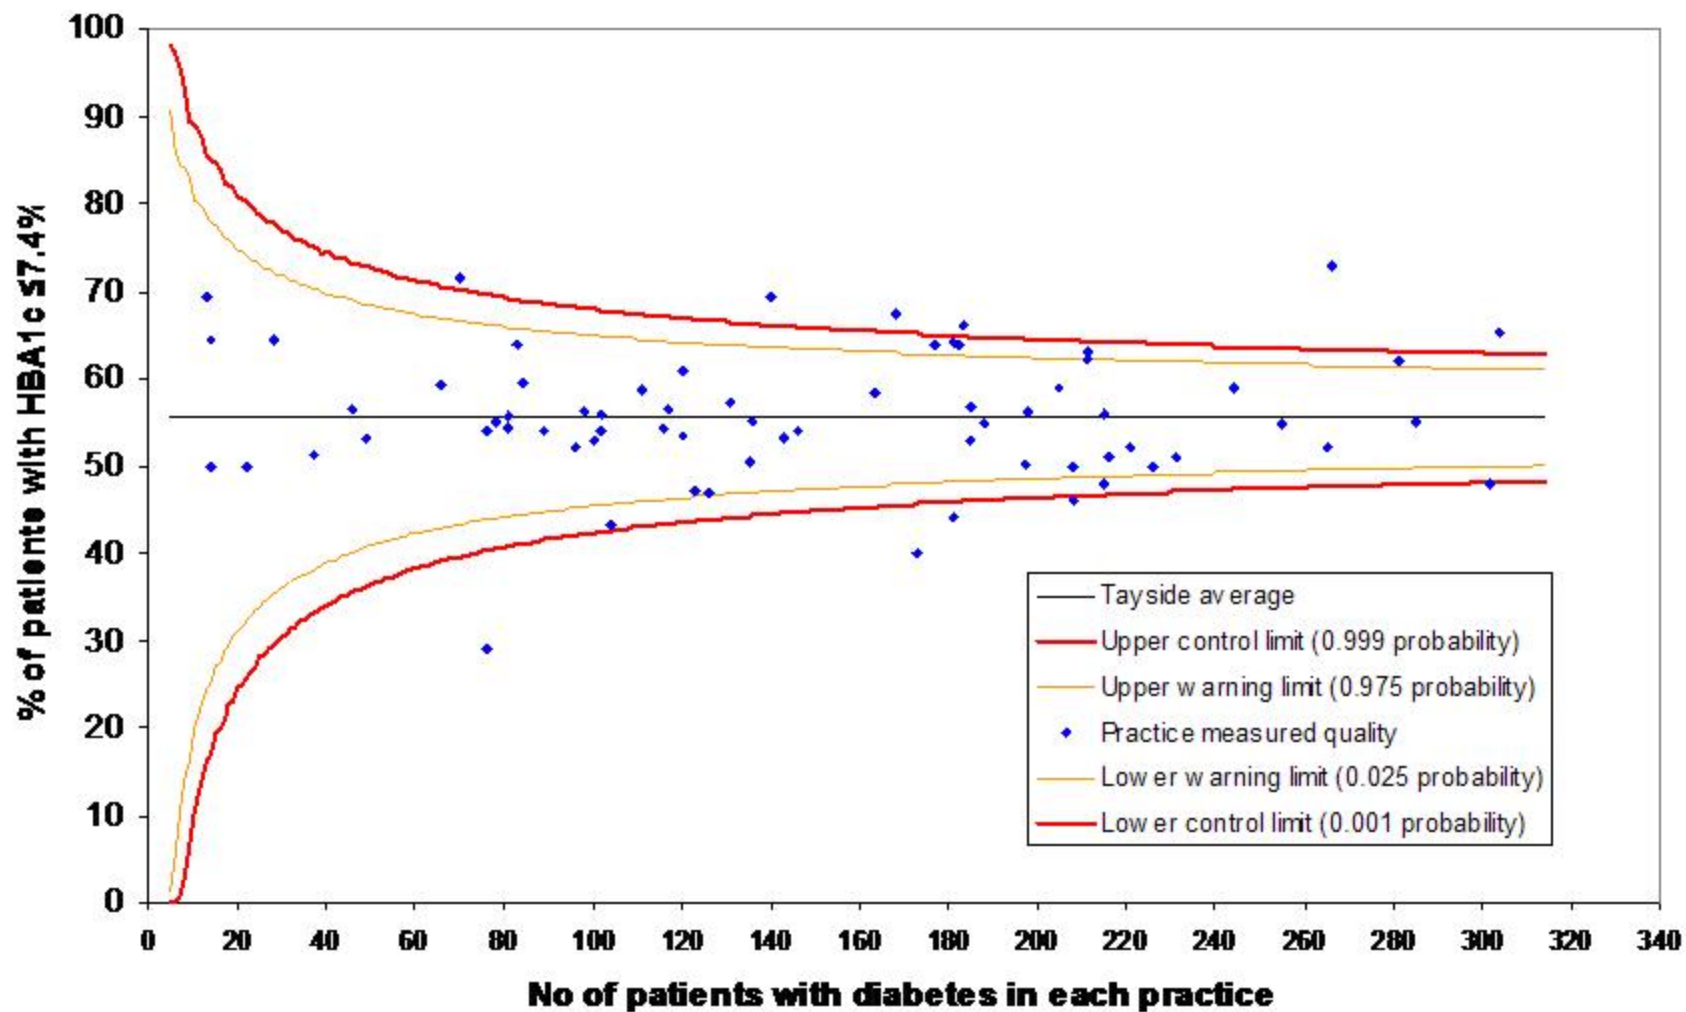

| Tayside average | Indicator                  | Practice |   |   |   |   |   |   |   |   |    |    |    |    |    |
|-----------------|----------------------------|----------|---|---|---|---|---|---|---|---|----|----|----|----|----|
|                 |                            | 1        | 2 | 3 | 4 | 5 | 6 | 7 | 8 | 9 | 10 | 11 | 12 | 13 | 14 |
| 81.7%           | BMI recorded               | ○        | ○ | ○ | ● | ● | ● | ○ | ○ | ● | ●  | ●  | ○  | ○  | ○  |
| 92.6%           | Smoking recorded           | ○        | ○ | ○ | ● | ○ | ● | ● | ● | ● | ○  | ○  | ○  | ○  | ○  |
| 92.7%           | HBA1c measured             | ○        | ○ | ○ | ● | ○ | ○ | ○ | ○ | ○ | ○  | ○  | ○  | ○  | ○  |
| 55.7%           | HBA1c ≤7.4%                | ○        | ○ | ○ | ● | ○ | ○ | ○ | ○ | ● | ○  | ○  | ○  | ○  | ○  |
| 86.8%           | HBA1c ≤10%                 | ○        | ○ | ○ | ● | ○ | ○ | ○ | ○ | ○ | ○  | ○  | ○  | ○  | ○  |
| 69.3%           | Pulses screening           | ○        | ○ | ○ | ● | ○ | ● | ● | ● | ○ | ○  | ○  | ○  | ○  | ○  |
| 70.4%           | Neuropathy screening       | ○        | ○ | ○ | ● | ○ | ● | ● | ● | ○ | ○  | ○  | ○  | ○  | ○  |
| 85.5%           | BP measured                | ○        | ○ | ○ | ● | ○ | ● | ○ | ○ | ○ | ○  | ○  | ○  | ○  | ○  |
| 46.4%           | BP ≤145/85                 | ○        | ○ | ○ | ● | ○ | ● | ○ | ○ | ○ | ○  | ○  | ○  | ○  | ○  |
| 57.6%           | Microalbuminuria screening | ○        | ○ | ○ | ● | ○ | ● | ● | ● | ○ | ○  | ○  | ○  | ○  | ○  |
| 91.6%           | Creatinine measured        | ○        | ○ | ○ | ● | ○ | ○ | ○ | ○ | ○ | ○  | ○  | ○  | ○  | ○  |
| 84.8%           | Cholesterol measured       | ○        | ○ | ○ | ● | ○ | ○ | ○ | ○ | ○ | ○  | ○  | ○  | ○  | ○  |
| 52.1%           | Cholesterol ≤5 mmol/l      | ○        | ○ | ○ | ● | ○ | ○ | ○ | ○ | ○ | ○  | ○  | ○  | ○  | ○  |

- Much better than Tayside average [outside 99% upper control limit]
- Better than Tayside average [between upper 95% warning and 99% control limits]
- Consistent with Tayside average
- Worse than Tayside average [between lower 95% warning and 99% control limits]
- Much worse than Tayside average [outside 99% lower control limit]

| Indicator                       | CHD | Stroke | Diabetes | HT | Asthma | COPD | All patients |
|---------------------------------|-----|--------|----------|----|--------|------|--------------|
| Had influenza vaccination       |     |        |          |    |        |      |              |
| Smoking recorded                |     |        |          |    |        |      |              |
| Smoking advice given            |     |        |          |    |        |      |              |
| BP measured                     |     |        |          |    |        |      |              |
| BP controlled $\leq 150/90$     |     |        |          |    |        |      |              |
| Cholesterol measured            |     |        |          |    |        |      |              |
| Cholesterol controlled $\leq 5$ |     |        |          |    |        |      |              |
| Appropriate diagnosis           |     |        |          |    |        |      |              |
| On antiplatelet or warfarin     |     |        |          |    |        |      |              |

- Much better than comparator [outside upper control limit]
- Better than comparator [between upper warning and control limits]
- Achieving comparator
- Worse than comparator [between lower warning and lower control limits]
- Much worse than comparator [outside lower control limit]

Measures defined by new GMS contract ([www.nhsconfed.org/docs/annex\\_a\\_quality\\_indicators.doc](http://www.nhsconfed.org/docs/annex_a_quality_indicators.doc))

Comparator (arbitrarily) defined by maximum payment level in new GMS contract minus 10%
